# Supplementary material for: Ran Modulates Allosteric Crosstalk Between Importin β Surfaces
Source: Research Square preprint supplement (doi:10.21203/rs.3.rs-6449265/v1), 2025-04-25
Supplement: Supplementary file 1 [file f9ee7cd10f8b8ff4c1a0748c.docx]

**RAN MODULATES ALLOSTERIC CROSSTALK BETWEEN IMPORTIN SURFACES**

*Ying-Hui Ko 1, Fenglin Li 2, Stephanie Suinn 1, Junwei Li 1, Chun-Feng David Hou 3, Ravi K. Lokareddy 1 and Gino Cingolani 1**

1 Dept. of Biochemistry and Molecular Genetics, The University of Alabama at Birmingham, 1825 University Blvd, Birmingham, AL 35294, USA

2 Dept. of Biochemistry and Biophysics, Perelman School of Medicine, University of Pennsylvania, Philadelphia, PA 19104, USA

3 Department of Chemistry and Chemical Biology, Rutgers, the State University of New Jersey, Piscataway, NJ, 08854, USA

* **Corresponding Author and Lead Contact:**

E-mail: gcingola@uab.edu; Tel.: (205) 996 9730

**125-character teaser.** Comparative analysis of importin b conformational plasticity in the frozen-hydrated state.


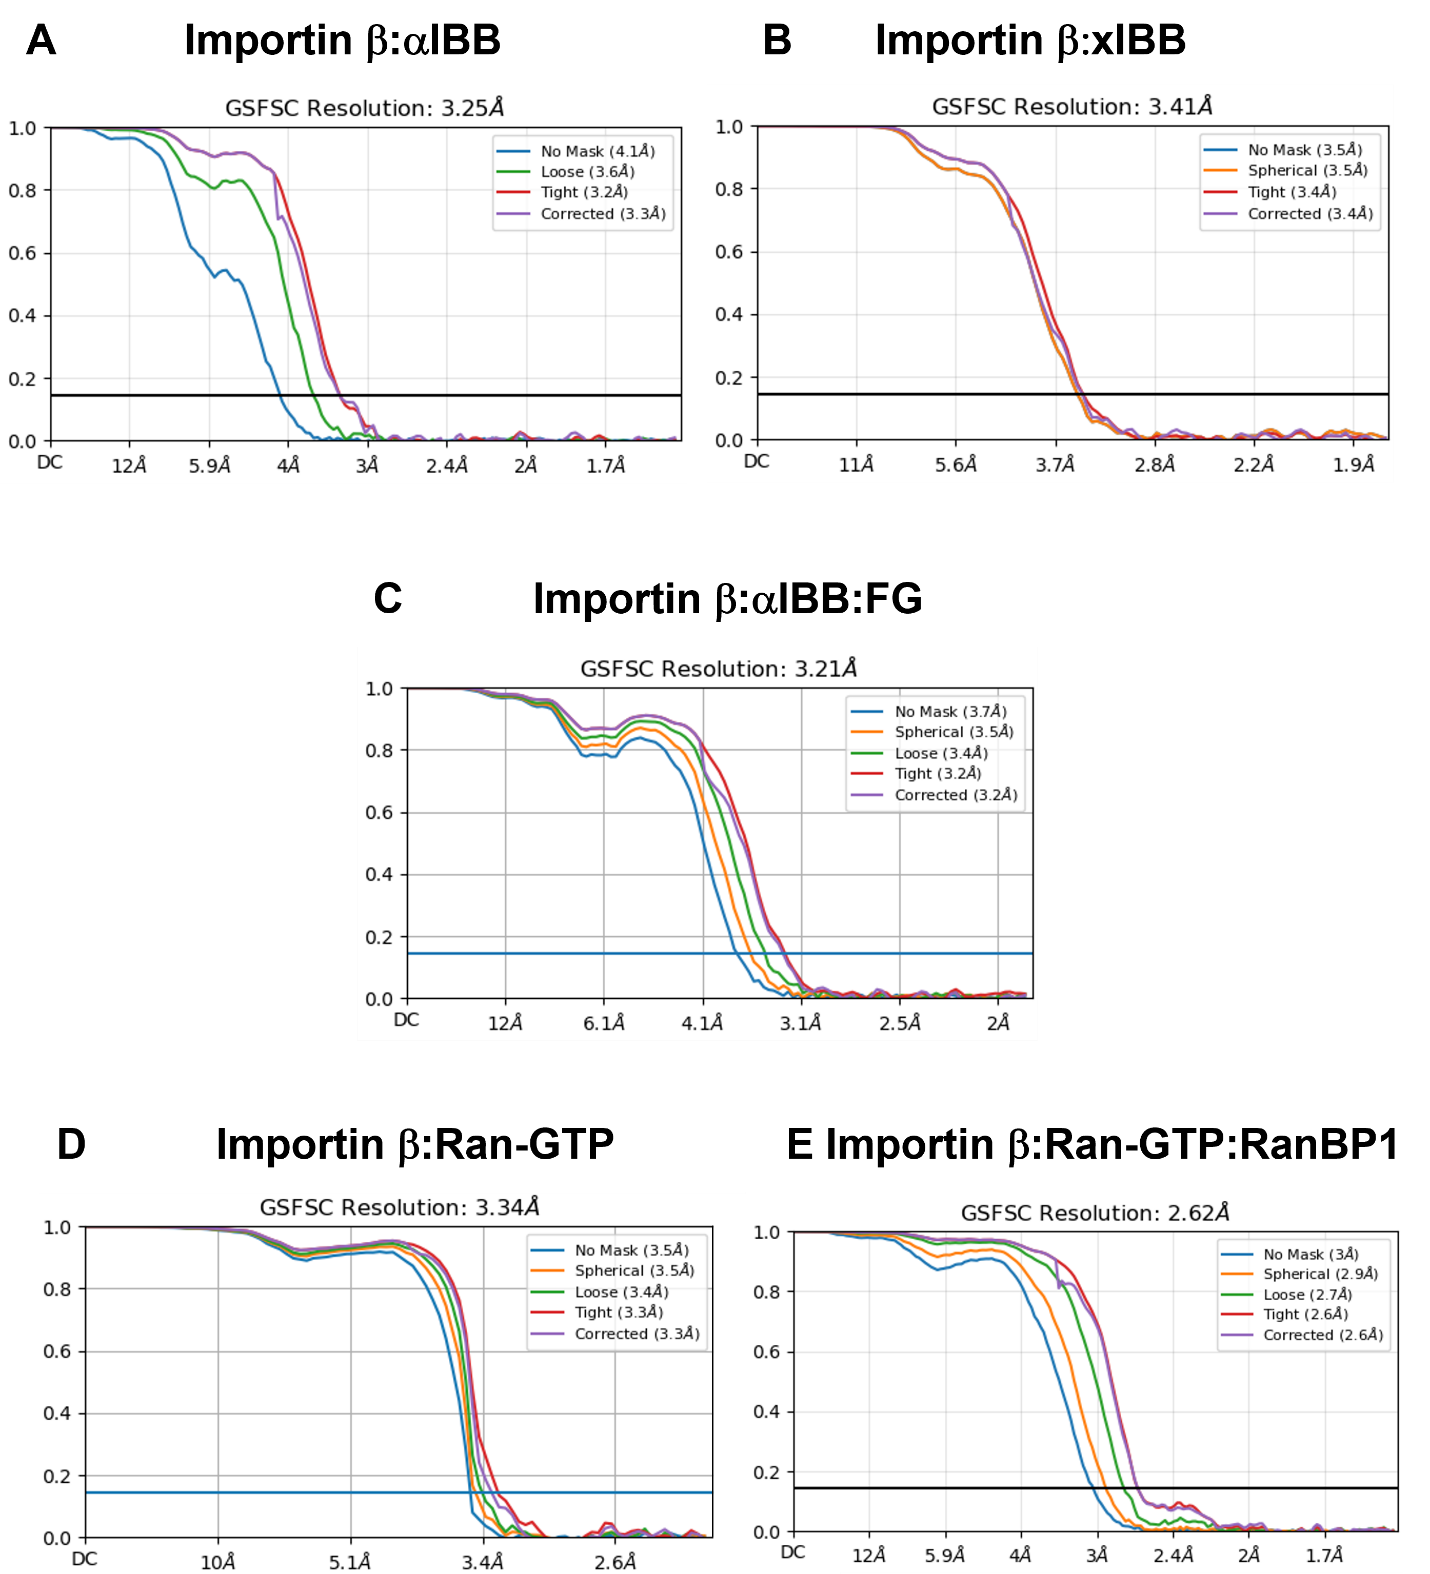


**Supplemental Figure 1. Fourier Shell Correlation (FSC) resolution curves for all reconstructions reported in this paper**: (**A**) importin b:aIBB; (**B**) importin b:xIBB; (**C**) importin b:aIBB:FG; (**D**) importin b:Ran-GTP; (**E**) importin b:Ran-GTP:RanBP1. The resolution for all FSC curves is indicated at 0.143 cut-off.

**
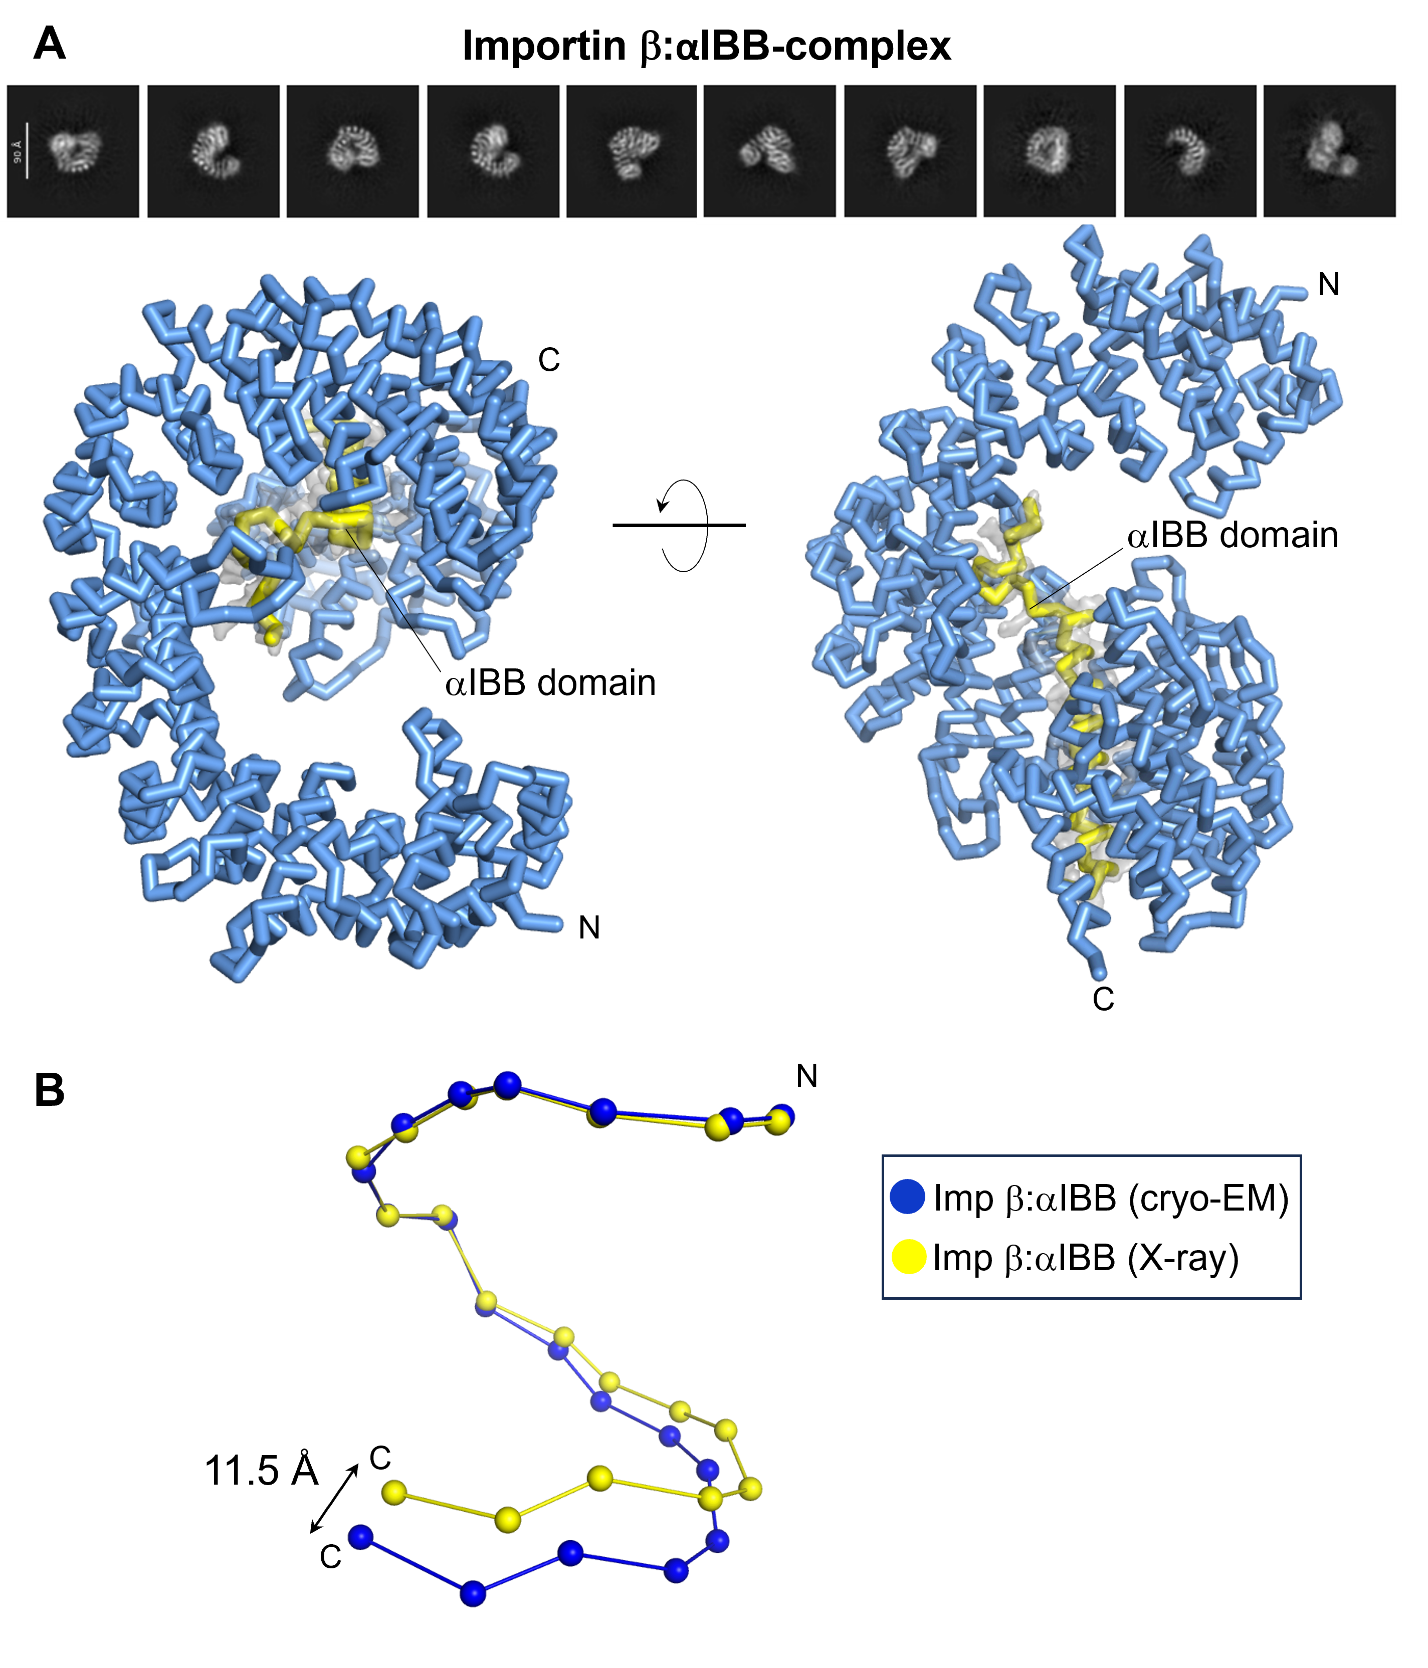
**

**Supplemental Figure 2. Cryo-EM structure of the importin b:aIBB complex.** (**A**) Representative 2D class averages (*top*) and 3D-structure of the importin b:aIBB complex (*bottom*). Importin b is colored blue with the aIBB in yellow. The final 3.3 Å cryo-EM density (colored gray) for the aIBB is overlaid onto the refined model. (**B**) Superimposition of importin b in the conformation observed in the cryo-EM reconstruction (blue) and crystal structure, PDB 1QGK (yellow), shown as beads-on-a-string. Each bead represents a HEAT repeat.

**
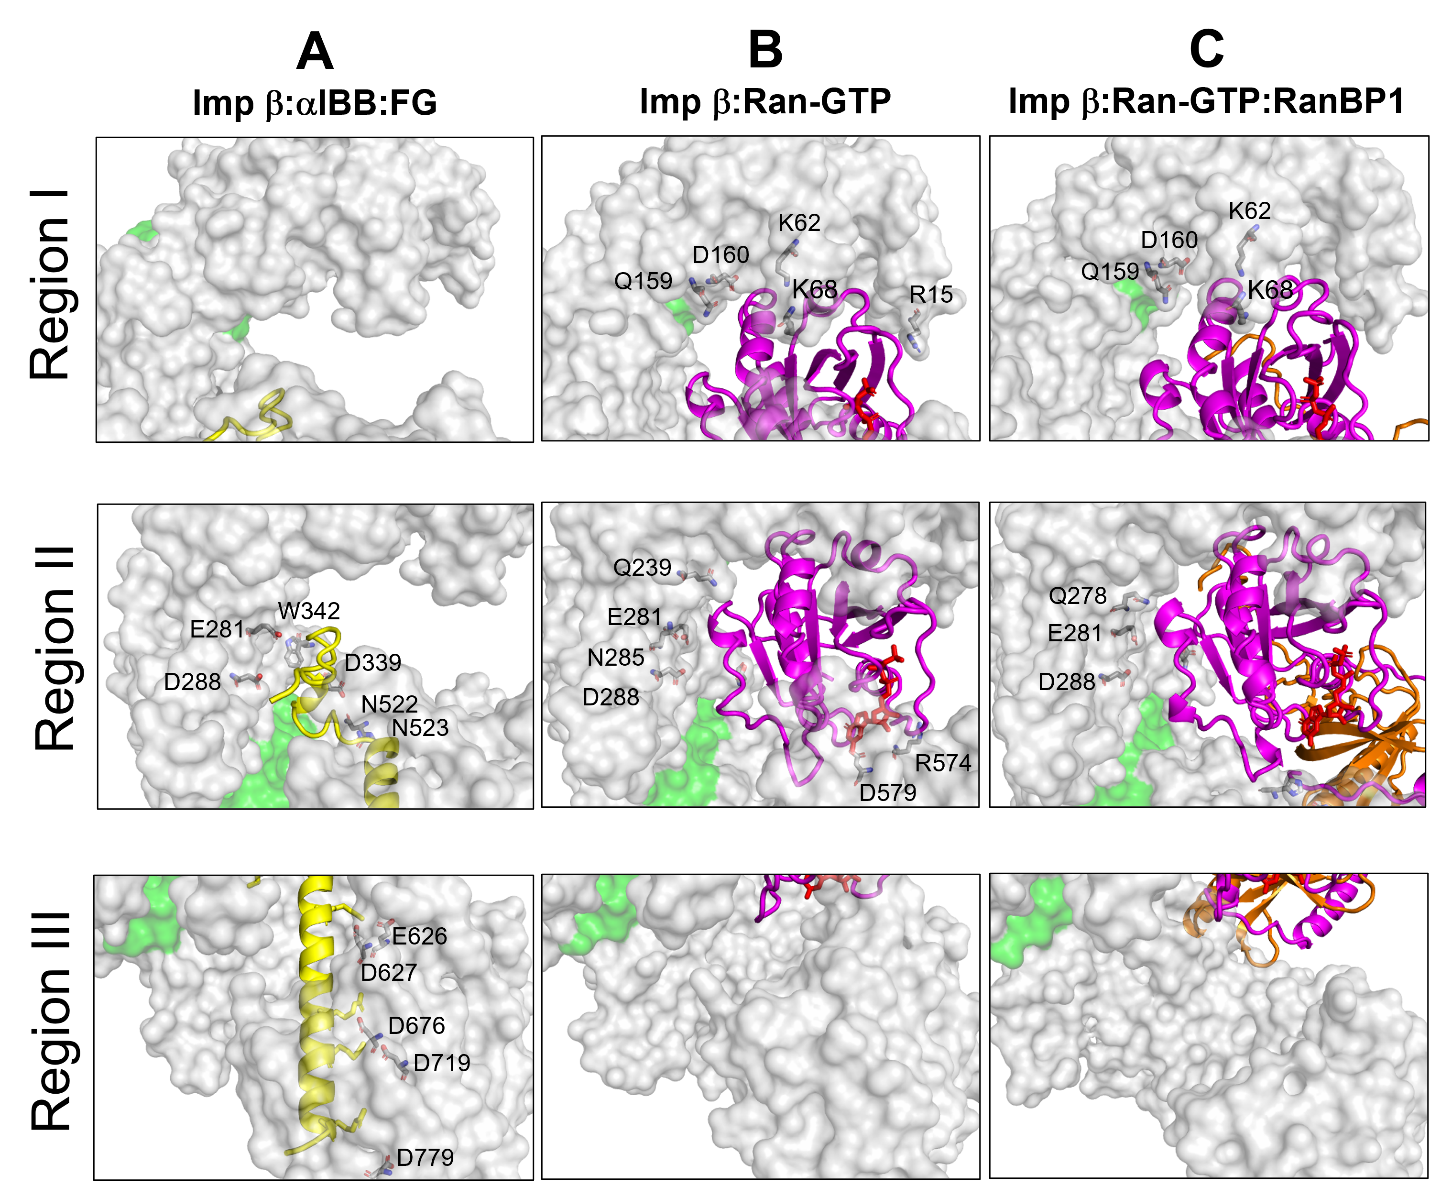
**

**Supplemental Figure 3. aIBB and Ran-GTP bind to largely distinct regions of importin b**. Magnified views of importin b region I (res. 1-252, HEATs 1-6), region II (res. 253-599, HEATs 7-13), and region III (res. 600-876, HEATs 14-19) in complex with aIBB (**A**), Ran-GTP (**B**) and Ran-GTP:RanBP1. (**C**) Contact residues are represented as sticks, and residue numbers are indicated. Importin b is shown as a semi-transparent gray surface. aIBB, Ran-GTP, and RanBP1 are shown in ribbon representation, colored yellow, magenta, and orange, respectively.

**Supplementary Table 1. Volumes of the FG-binding pocket in importin β, as estimated by FPocketWeb.**

|  | **Importin b:**  **aIBB:FG (Å3)** | **Importin b:**  **Ran-GTP (Å3)** | **Importin b:**  **Ran-GTP:RBP1 (Å3)** |
| --- | --- | --- | --- |
| Pocket 1 | 502 | 122 | 303 |
| Pocket 2 | 154 | 200 | 224 |
| Pocket 3 | 214 | 232 | 195 |
| Pocket 4 | 500 | 194 | 325 |
| Pocket 5 | 545 | 582 | 290 |
